# Supplementary material
Source: PubMed Central journal article supplement (PMC8443315)
Supplement: mmc1.pdf [file mmc1.pdf]

## **DATA STATEMENT**

Data not available/ Not applicable.
